# Supplementary material for: An automated and portable antimicrobial susceptibility testing system for urinary tract infections
Source: Royal Society of Chemistry journal article supplement (doi:10.1039/d0lc01315c), 2021-01-01
Supplement: d0lc01315c1.pdf [file d0lc01315c1.pdf]

## Supplementary Information

### **An automated and portable antimicrobial susceptibility testing system for urinary tract infections**

Kuo-Wei Hsu<sup>a</sup>, Wen-Bin Lee<sup>a</sup>, Huey-Ling You<sup>d</sup>, Mel S. Lee<sup>\*e</sup>, and Gwo-Bin Lee<sup>\*abc</sup>

---

*<sup>a</sup>Department of Power Mechanical Engineering, National Tsing Hua University, 30013 Hsinchu, Taiwan*

*<sup>b</sup>Institute of Biomedical Engineering, National Tsing Hua University, Hsinchu 30013, Taiwan*

*<sup>c</sup>Institute of NanoEngineering and Microsystems, National Tsing Hua University, Hsinchu 30013, Taiwan*

*<sup>d</sup>Laboratory Medicine, Kaohsiung Chang Gung Memorial Hospital, Chang Gung University, Kaohsiung 83301, Taiwan*

*<sup>e</sup>Department of Orthopaedic Surgery, Kaohsiung Chang Gung Memorial Hospital, Chang Gung University, Kaohsiung 83301, Taiwan.*

Table S1: Comparison of Fluidigm® C1 system and our devices

|            | Fluidigm® C1 system | This study         |
|------------|---------------------|--------------------|
| Microvalve | Normally-open       | Normally-closed    |
| Micropump  | Peristaltic pumping | One-time injection |
| Micromixer | None                | Membrane-type      |
